# Supplementary material
Source: PubMed Central journal article supplement (PMC5861814)
Supplement: AEM.02335-17_zam007188405s1.pdf [file AEM.02335-17_zam007188405s1.pdf]

# Supplementary Material for

## **Microbiome structure influences infection by the parasite *Crithidia bombi* in bumble bees**

Blair K. Mockler, Waldan K. Kwong, Nancy A. Moran, Hauke Koch

**Contents:** Figures S1 and S2  
Table S1

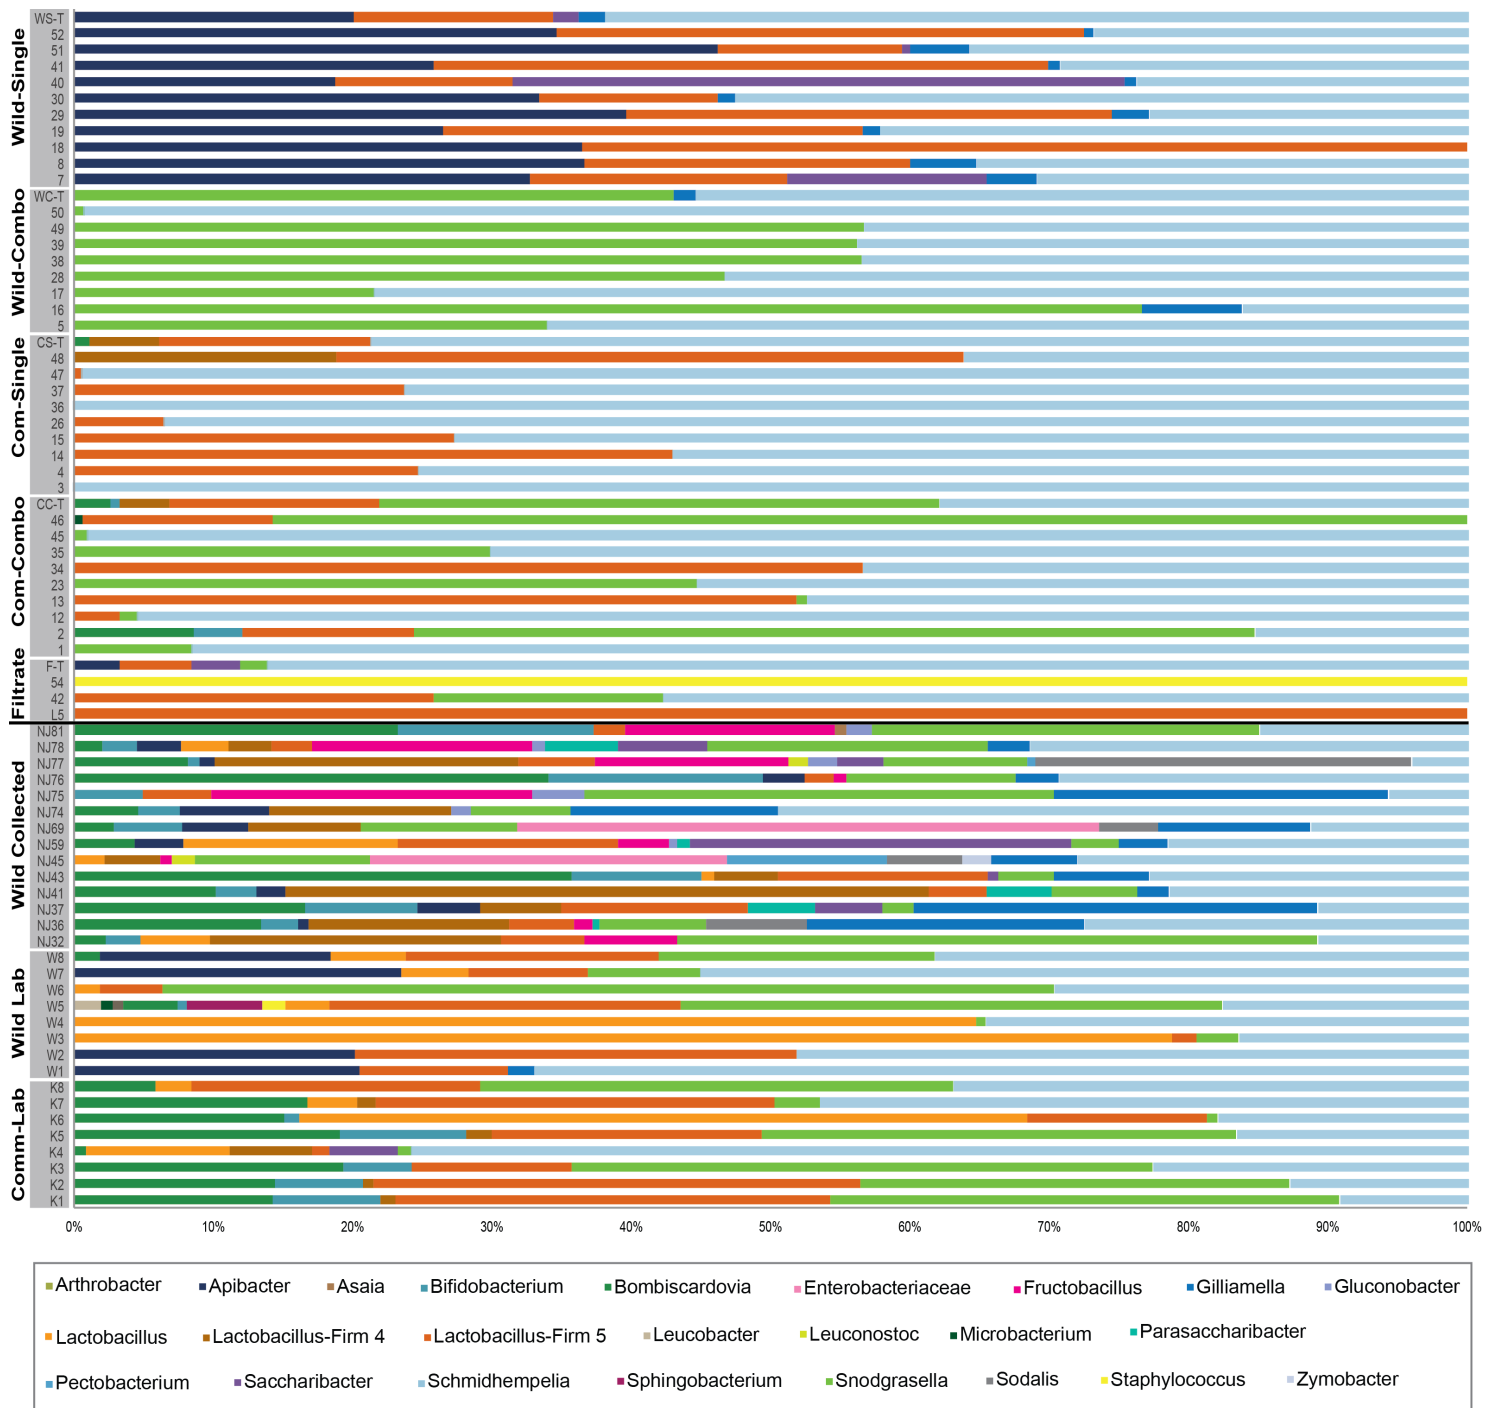

**Figure S1.** Microbiome composition of all samples, including that of the microbiota treatment inoculums (Wild-Single, Wild-Combo, Commercial-Single, Commercial-Combo, Filtrate), and samples from wild-collected bees and lab-raised bees from wild and commercial (Koppert) sources.

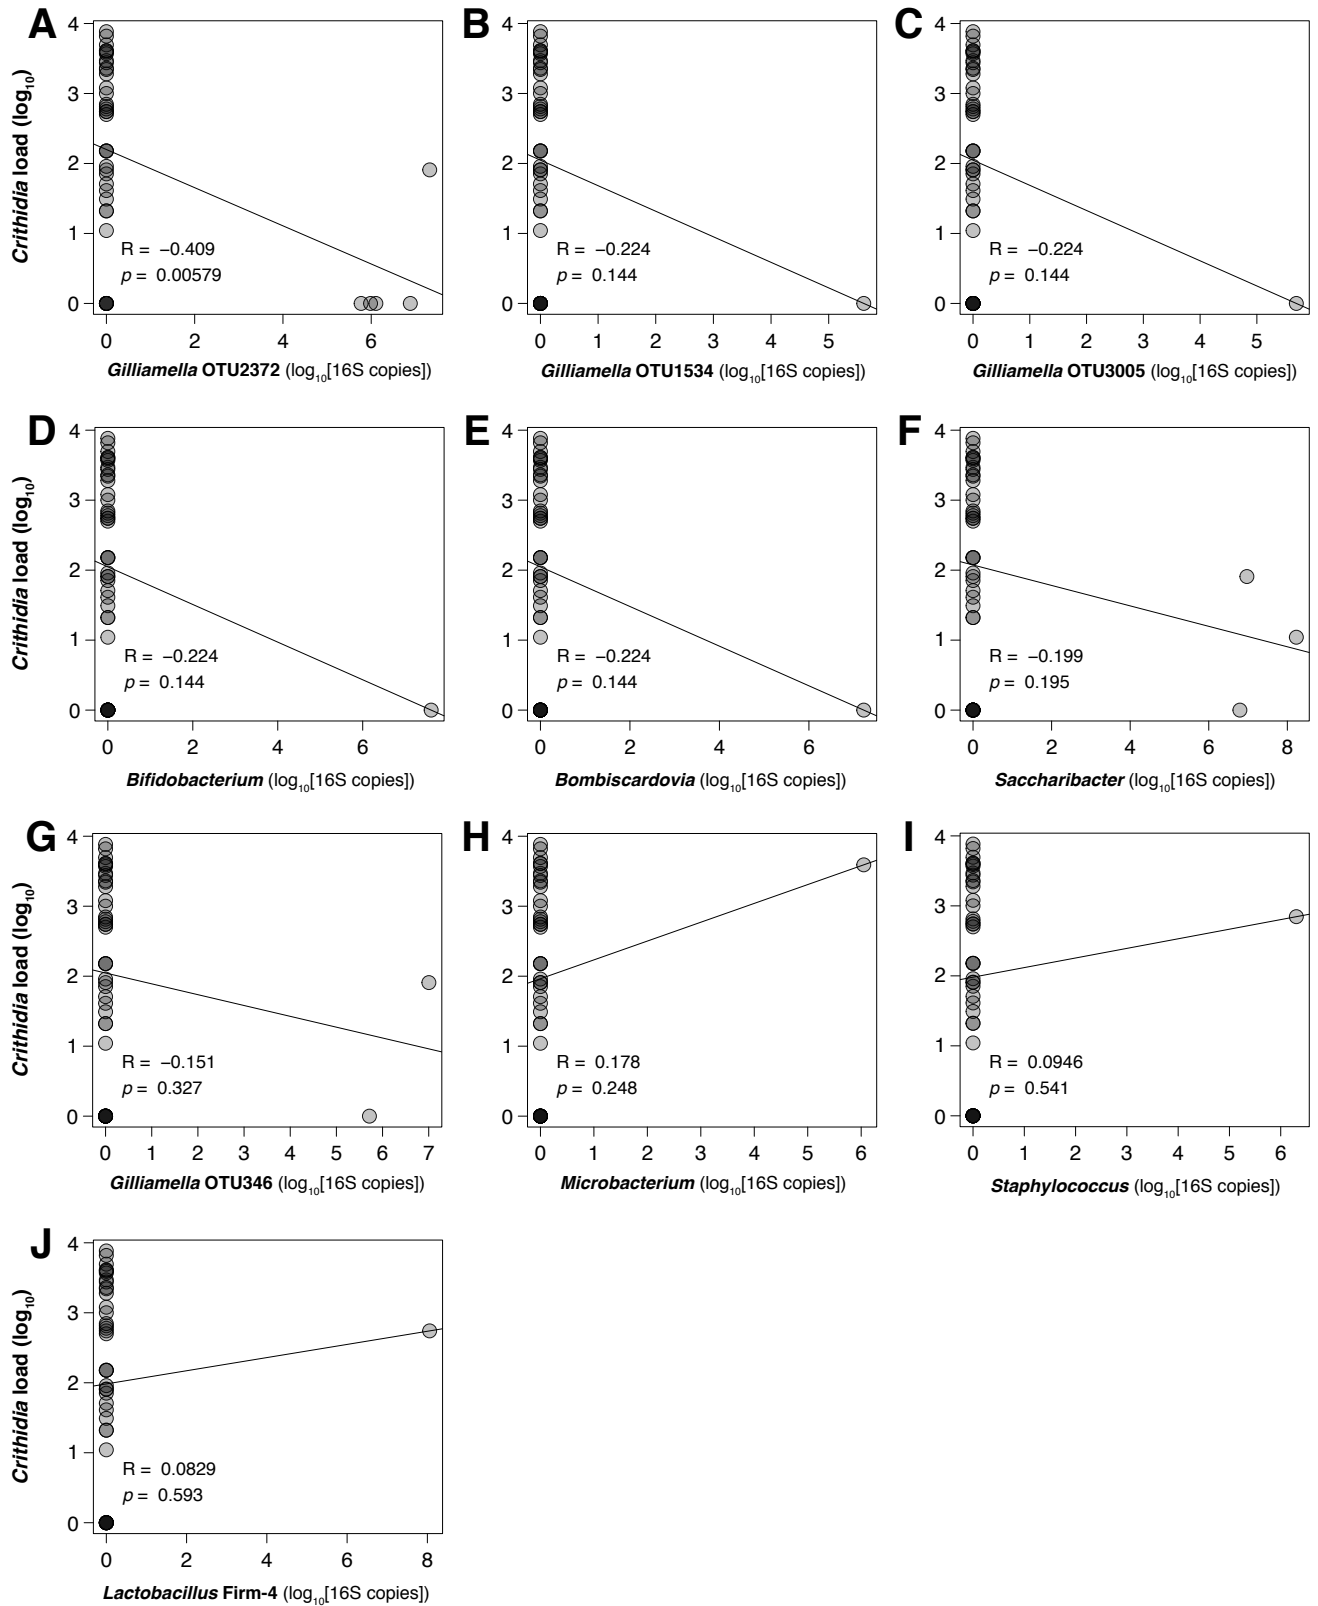

**Figure S2.** Additional correlations between *C. bombi* infection load and microbial phylotypes. Pearson correlation statistics shown. *C. bombi* load expressed as number of cells per 10  $\mu$ L.

**Table S1.** Correlations between *Crithidia* load and microbiome metrics within the experimental treatment groups.

| <i>Crithidia</i> load correlation    | Pearson |            | Spearman |           |
|--------------------------------------|---------|------------|----------|-----------|
|                                      | R       | p-value    | R        | p-value   |
| OTUs at 97% identity                 | -0.553  | 0.0000999  | -0.567   | 0.0000608 |
| Shannon's H                          | -0.552  | 0.000103   | -0.561   | 0.0000740 |
| Bacterial load                       | -0.451  | 0.00114    | -0.473   | 0.000596  |
| <i>Apibacter</i>                     | -0.617  | 0.00000824 | -0.578   | 0.0000405 |
| <i>Lactobacillus</i> Firm-5          | -0.549  | 0.000114   | -0.529   | 0.000226  |
| <i>Gilliamella</i> OTU3348           | -0.322  | 0.0328     | -0.365   | 0.0149    |
| <i>Snodgrassella</i>                 | 0.197   | 0.199      | 0.168    | 0.277     |
| <u>without wild-single treatment</u> |         |            |          |           |
| OTUs at 97% identity                 | -0.425  | 0.0123     | -0.329   | 0.0577    |
| Shannon's H                          | -0.274  | 0.117      | -0.296   | 0.0887    |
| Bacterial load                       | -0.279  | 0.853      | -0.324   | 0.0444    |
| <i>Apibacter</i>                     | -       | -          | -        | -         |
| <i>Lactobacillus</i> Firm-5          | -0.304  | 0.0807     | -0.286   | 0.101     |
| <i>Gilliamella</i> OTU3348           | -0.320  | 0.0652     | -0.349   | 0.0428    |
| <i>Snodgrassella</i>                 | -0.0867 | 0.626      | -0.0925  | 0.603     |
